# Supplementary material for: Ganoderma atrum polysaccharide modulates the M1/M2 polarization of macrophages linked to the Notch signaling pathway
Source: Royal Society of Chemistry journal article supplement (doi:10.1039/d1fo04309a), 2022-01-01
Supplement: d1fo04309a1.pdf [file d1fo04309a1.pdf]

## Supplementary material

The structure of *Ganoderma atrum* polysaccharide (PSG-1), and more details could be found in the published article “H. Zhang, W.-J. Li, S.-P. Nie, Y. Chen, Y.-X. Wang and M.-Y. Xie, Structural characterisation of a novel bioactive polysaccharide from *Ganoderma atrum*, *Carbohydrate Polymers*, 2012, **88**, 1047-1054. <https://doi.org/10.1016/j.carbpol.2012.01.061>.”

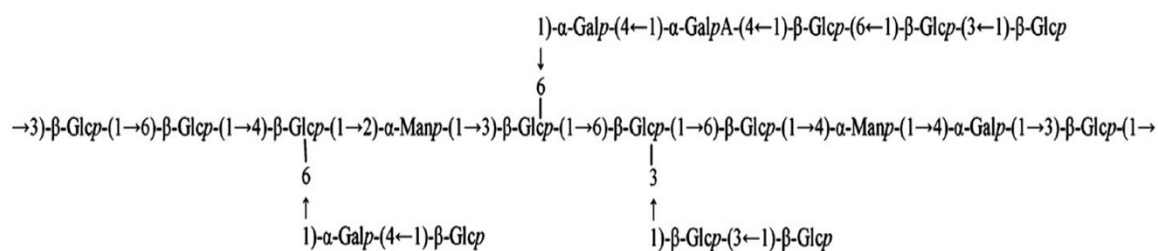

Fig. S1. Possible molecular structure of PSG-1.
